# Supplementary material for: Structure, bonding and adaptive aromaticity in rhenium-oxo complexes: a DFT study
Source: Royal Society of Chemistry journal article supplement (doi:10.1039/d2nj00911k), 2022-01-01
Supplement: d2nj00911k1.pdf [file d2nj00911k1.pdf]

## Supporting Information

### **Structure, Bonding and Adaptive Aromaticity in Rhenium-oxo Complexes: A DFT Study**

Qingfu Ye and Jun Zhu\*

State Key Laboratory of Physical Chemistry of Solid Surfaces and Collaborative Innovation Center of Chemistry for Energy Materials (iChEM), Fujian Provincial Key Laboratory of Theoretical and Computational Chemistry and Department of Chemistry, College of Chemistry and Chemical Engineering, Xiamen University, Xiamen 361005, China.

\*Email: [jun.zhu@xmu.edu.cn](mailto:jun.zhu@xmu.edu.cn)

**Table S1.** The  $\pi$ -EDDB comparison of B3LYP and CAM-B3LYP with the def2-TZVP basis set. The  $\alpha$  spin and  $\beta$  spin in triplet states are divided by “//”, ( $\alpha$  spin// $\beta$  spin)

| $\pi$ -EDDB | 1- $S_0$ | 2- $S_0$ | 3- $S_0$ | 4- $S_0$ | 1- $T_1$   | 2- $T_1$   | 3- $T_1$   | 4- $T_1$   |
|-------------|----------|----------|----------|----------|------------|------------|------------|------------|
| B3LYP       | 5.36     | 5.44     | 5.65     | 6.58     | 1.70//1.19 | 2.21//1.35 | 2.03//1.76 | 3.15//3.56 |
| CAM-B3LYP   | 5.36     | 5.44     | 5.64     | 6.58     | 1.70//1.18 | 2.21//1.35 | 2.02//1.76 | 3.15//3.56 |

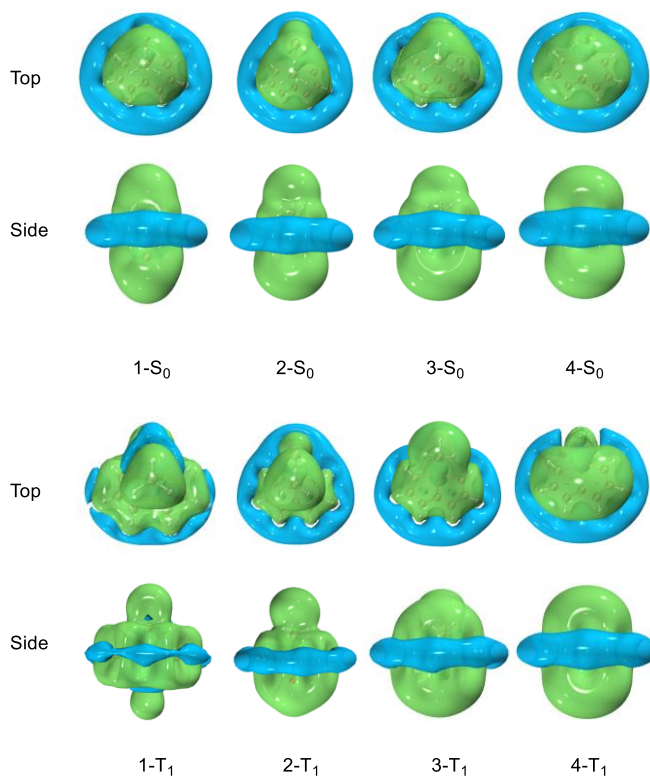

**Fig. S1.** The ICSS<sub>zz</sub> (iso-chemical shielding surfaces) plots, top and side views, isovalue 2. Spaces in green means magnetic shielding, and blue means magnetic deshielding.

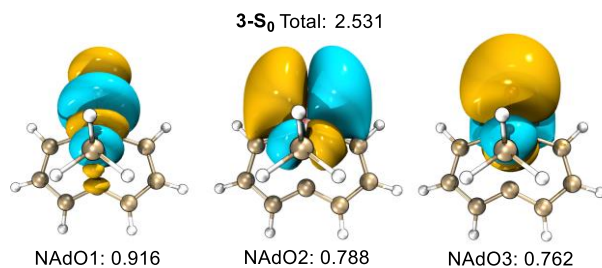

**Fig. S2.** The BOD analysis of 3- $S_0$ , isovalue 0.01 a.u.

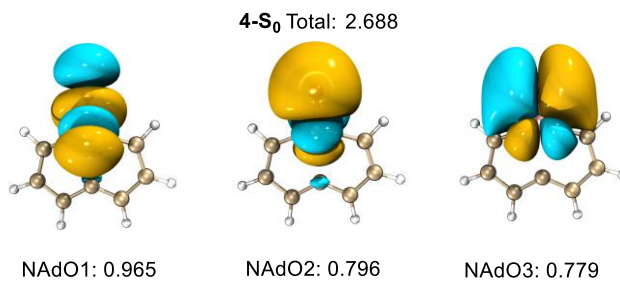

**Fig. S3.** The BOD analysis of 4- $S_0$ , isovalue 0.01 a.u.

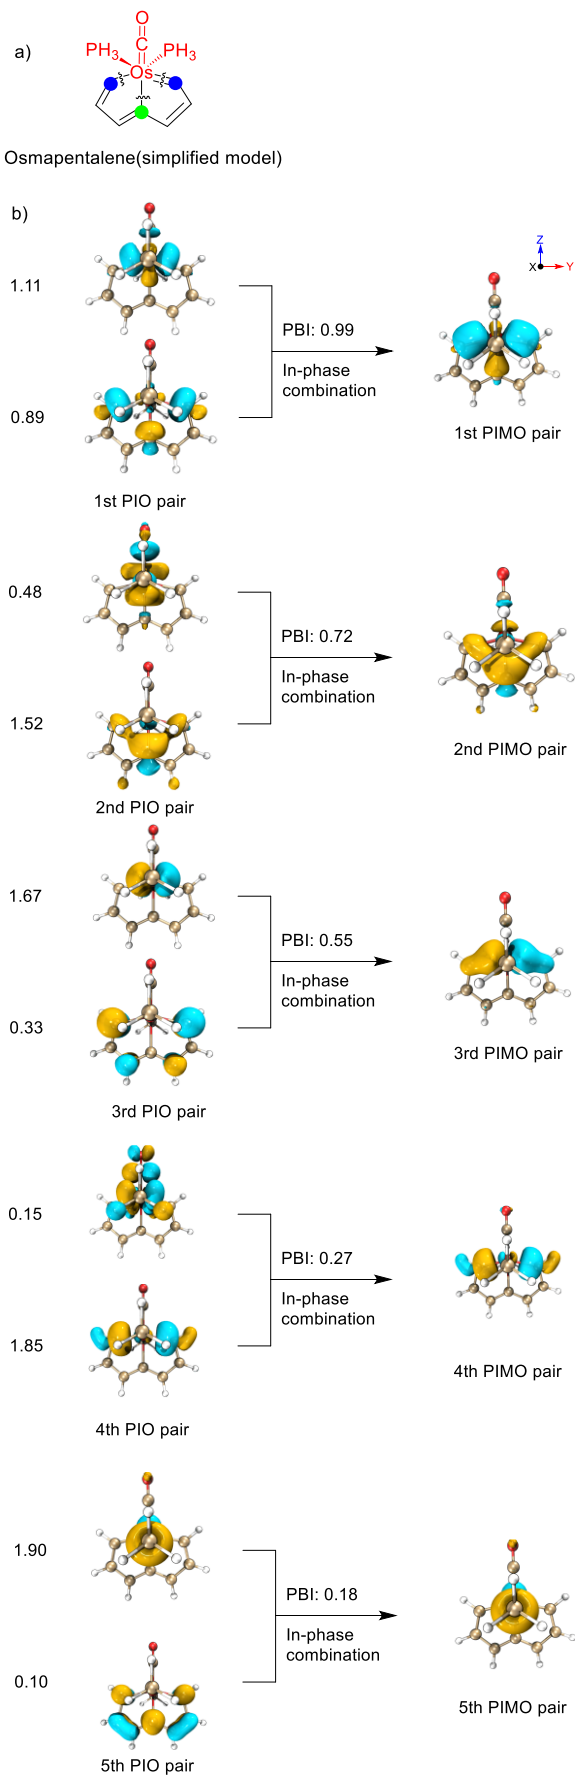

**Fig. S4.** The PIO analysis of simplified 18e osmapentalene based on reported geometry structure (Zhu C, *et al. Nat. Commun.* 2014, 5 (1), 3265), isovalue 0.05 a.u.

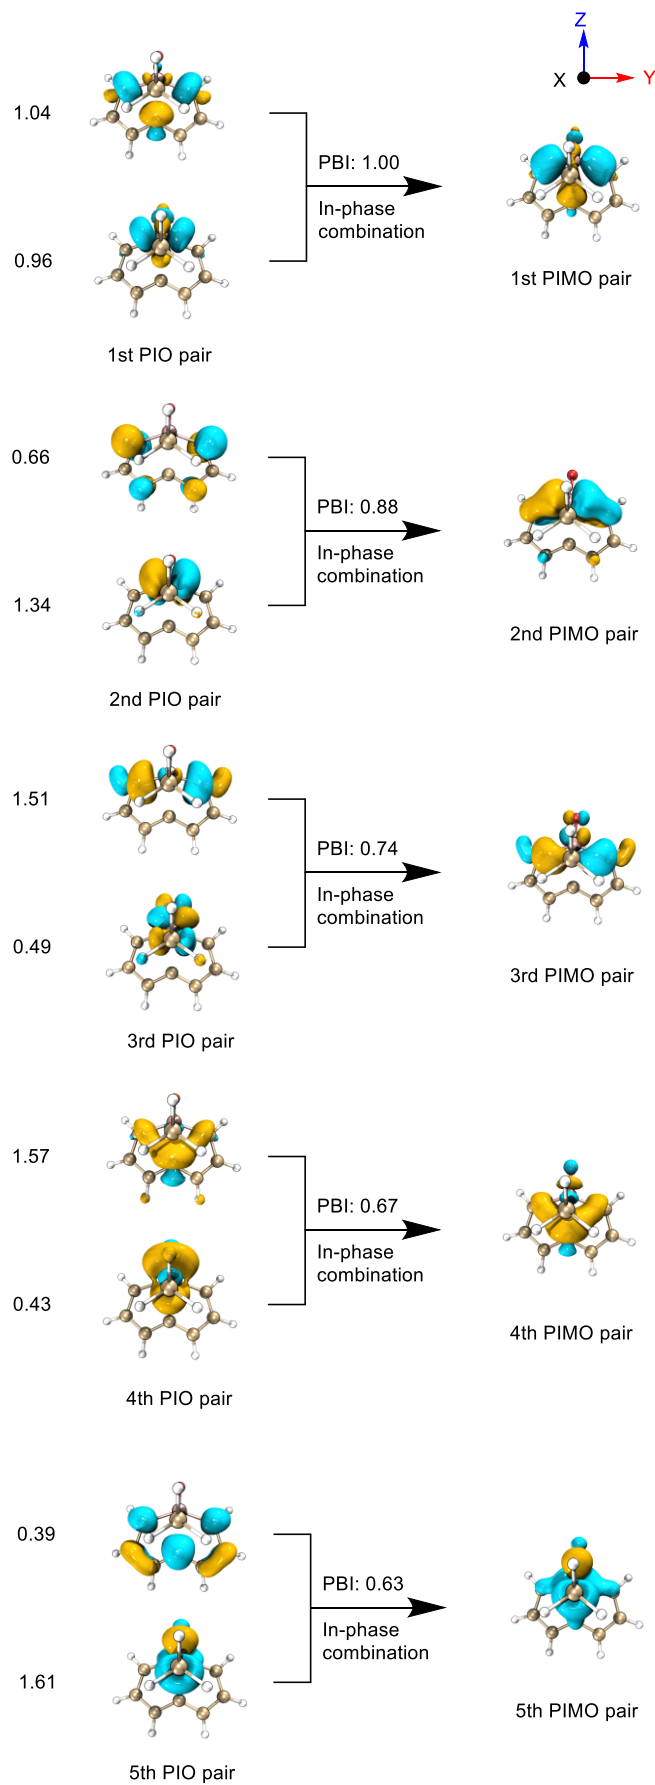

Fig. S5. The PIO analysis of  $3-S_0$ , isovalue 0.05 a.u.

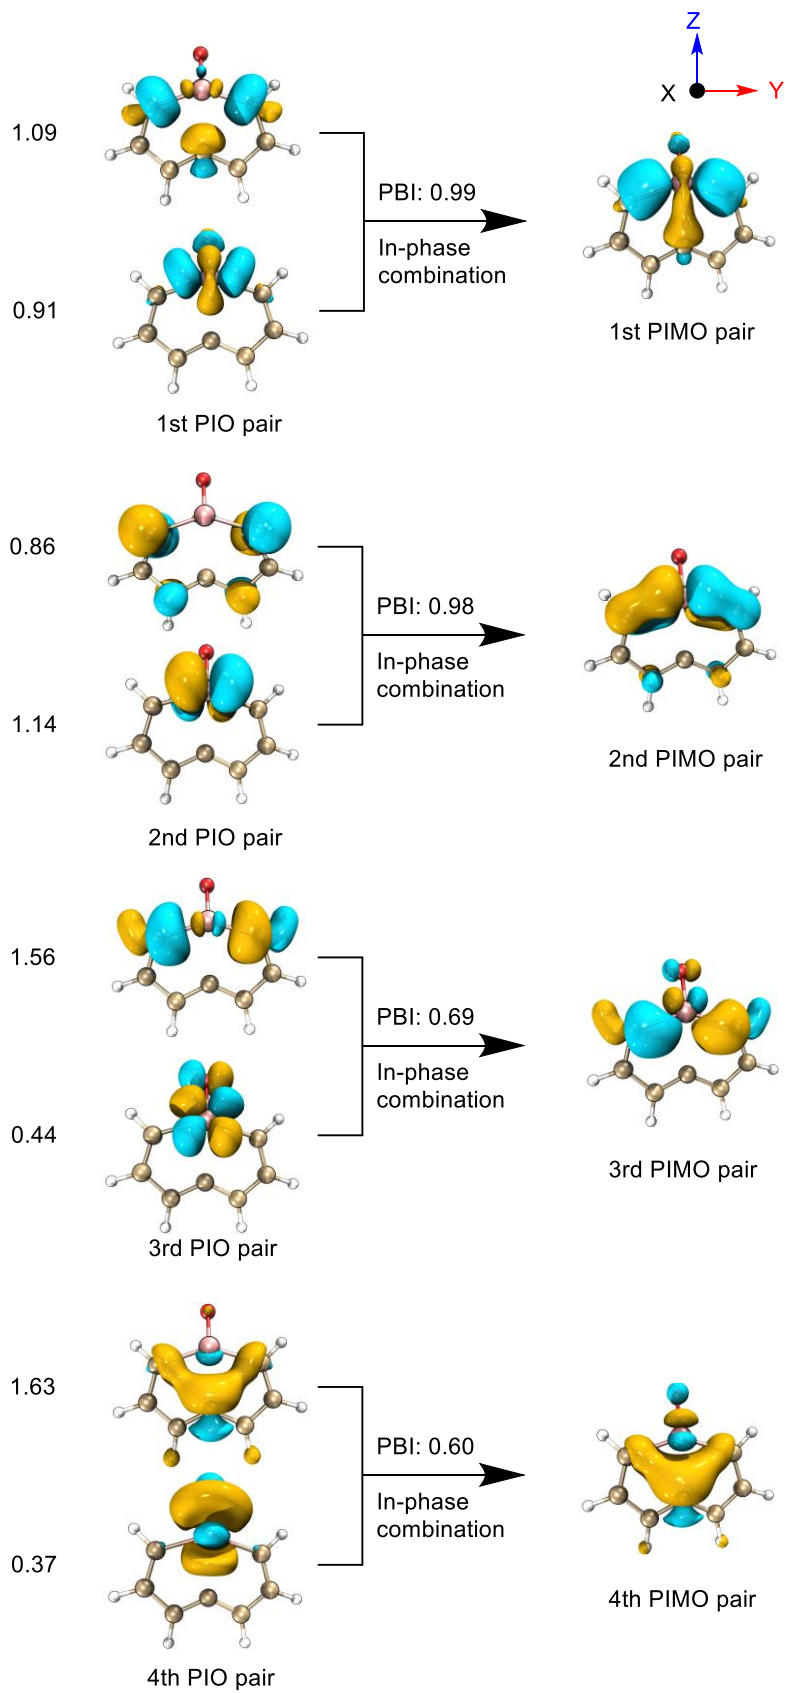

Fig. S6. The PIO analysis of  $4-S_0$ , isovalue 0.05 a.u.

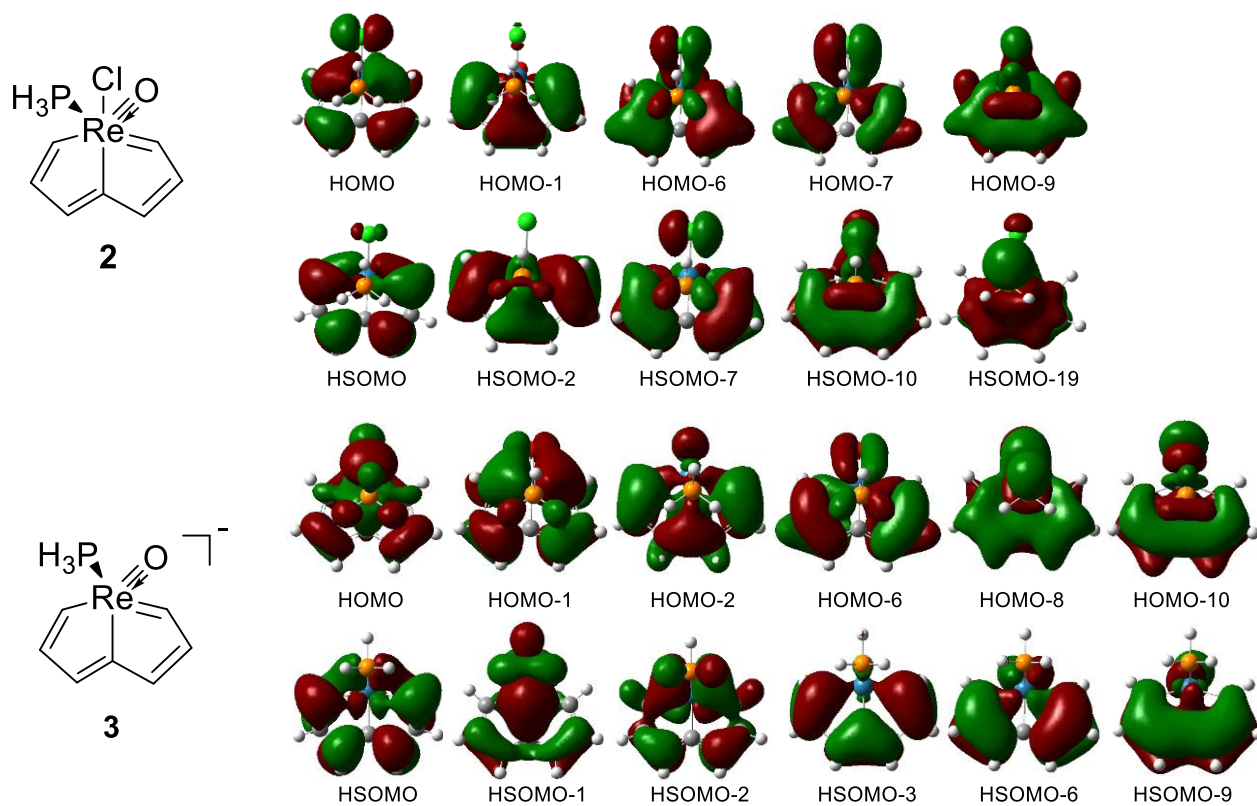

**Fig. S7.** The occupied  $\pi$ -type molecular orbitals of **2** and **3** in the ground state and triplet states, isovalue 0.02 a.u.

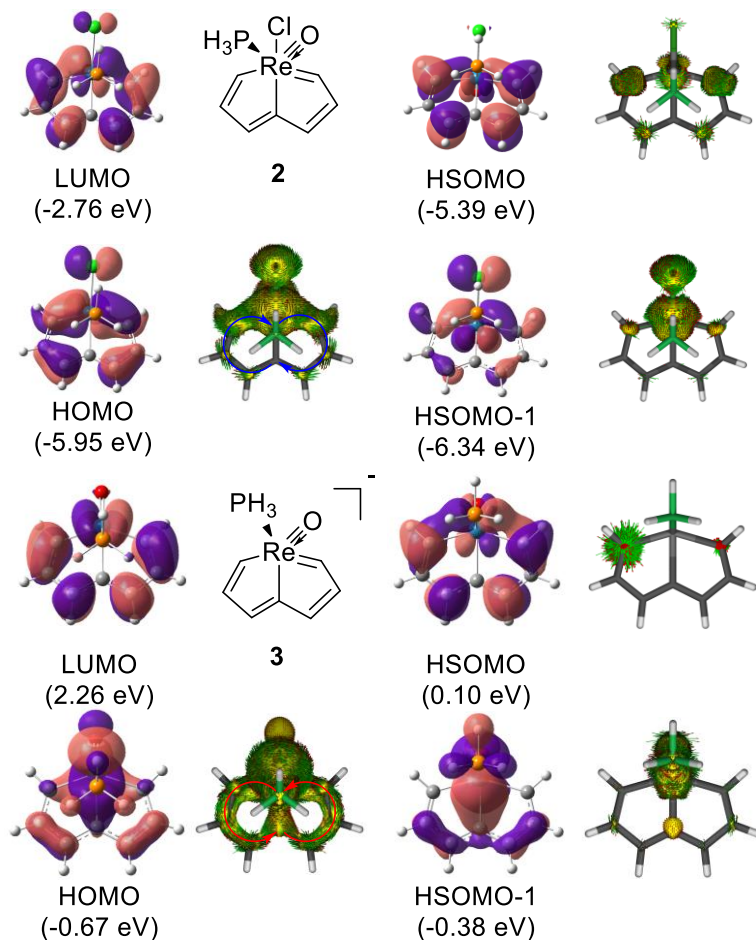

**Fig. S8.** AICD plots for the HOMO-LUMO of ground states and HSOMO, HSOMO-1 of triplet states of **2** and **3**. The key frontier molecular orbitals in ground states are corresponding to the excitation pattern. The isovalues for MO and AICD are both 0.03 a.u.

**Cartesian coordinates together with the electronic energies for all the complexes calculated.**

**1-S<sub>0</sub>**

E = -1227.464640 a.u.

|   |           |           |           |
|---|-----------|-----------|-----------|
| C | 1.658389  | 1.641608  | 1.249754  |
| C | 0.974719  | 1.035684  | 2.314927  |
| C | 0.020798  | 0.111836  | 1.939458  |
| C | 1.276892  | 1.178675  | -0.0003   |
| C | 0.020913  | 0.110717  | -1.939513 |
| C | 0.974903  | 1.03431   | -2.315464 |
| C | 1.658524  | 1.640829  | -1.250608 |
| H | 2.409155  | 2.413812  | 1.406184  |
| H | 1.187358  | 1.277051  | 3.351287  |
| H | -0.510095 | -0.46071  | 2.699132  |
| H | -0.50994  | -0.462261 | -2.698889 |
| H | 1.187609  | 1.275063  | -3.351953 |

|    |           |           |           |
|----|-----------|-----------|-----------|
| H  | 2.409334  | 2.41291   | -1.407439 |
| Re | -0.433225 | -0.337497 | 0.000077  |
| Cl | -2.139809 | 1.292122  | -0.000393 |
| P  | 1.709819  | -1.521484 | 0.000503  |
| H  | 2.576464  | -1.309059 | 1.086015  |
| H  | 1.641413  | -2.930347 | 0.000948  |
| H  | 2.57652   | -1.309755 | -1.085105 |
| O  | -1.157165 | -1.907525 | 0.000453  |

**2-S<sub>0</sub>**

E = -1227.459063 a.u.

|   |           |           |           |
|---|-----------|-----------|-----------|
| C | -2.442257 | -1.246331 | -0.217398 |
| C | -1.540736 | -2.314299 | -0.176855 |
| C | -0.219363 | -1.927342 | -0.224245 |
| C | -1.833    | 0.000075  | -0.287322 |
| C | -0.219234 | 1.927359  | -0.224079 |
| C | -1.540585 | 2.314414  | -0.176588 |

|    |           |           |           |
|----|-----------|-----------|-----------|
| C  | -2.442175 | 1.246523  | -0.217226 |
| H  | -3.52014  | -1.37734  | -0.194985 |
| H  | -1.85704  | -3.351119 | -0.144982 |
| H  | 0.567867  | -2.652735 | -0.428445 |
| H  | 0.568037  | 2.652711  | -0.428272 |
| H  | -1.856804 | 3.351256  | -0.144591 |
| H  | -3.52005  | 1.377598  | -0.194786 |
| Re | 0.398458  | 0.00001   | -0.380356 |
| P  | -0.466057 | -0.000162 | 2.177403  |
| H  | -1.260102 | -1.071157 | 2.636206  |
| H  | 0.508766  | -0.000448 | 3.194368  |
| H  | -1.259747 | 1.070979  | 2.636489  |
| O  | 1.070606  | 0.000039  | -1.953183 |
| Cl | 2.446762  | -0.000044 | 0.806021  |

### 3-S<sub>0</sub>

E = -767.254546 a.u.

|    |           |           |           |
|----|-----------|-----------|-----------|
| C  | -0.061687 | 1.914327  | -0.339003 |
| C  | 1.261362  | 2.309189  | -0.574279 |
| C  | 2.151303  | 1.246967  | -0.673724 |
| C  | 1.528611  | 0.000716  | -0.489193 |
| C  | 2.152537  | -1.245403 | -0.673389 |
| C  | 1.263554  | -2.308106 | -0.574373 |
| C  | -0.060158 | -1.913878 | -0.339568 |
| H  | 1.563971  | 3.347492  | -0.696749 |
| H  | 3.20544   | 1.372698  | -0.923395 |
| H  | 3.207055  | -1.370112 | -0.921907 |
| H  | 1.56652   | -3.346249 | -0.696851 |
| H  | -0.828787 | -2.689703 | -0.298344 |
| Re | -0.668985 | -0.000317 | -0.080042 |
| O  | -2.362819 | -0.000578 | -0.5605   |
| P  | 0.592868  | 0.000112  | 1.913838  |
| H  | 1.473512  | 1.079011  | 2.204982  |
| H  | -0.059786 | 0.00018   | 3.185455  |
| H  | 1.473113  | -1.079135 | 2.204409  |
| H  | -0.830751 | 2.689628  | -0.29683  |

### 4-S<sub>0</sub>

E = -424.030870 a.u.

|   |             |             |             |
|---|-------------|-------------|-------------|
| C | -2.28397900 | -1.24785900 | 0.11537400  |
| C | -1.35613100 | -2.30056600 | 0.01344000  |
| C | -0.01969200 | -1.92930000 | -0.04617100 |
| C | -1.68636100 | -0.00002800 | 0.14411800  |

|    |             |             |             |
|----|-------------|-------------|-------------|
| C  | -0.01975500 | 1.92928100  | -0.04615700 |
| C  | -1.35621600 | 2.30052100  | 0.01343300  |
| C  | -2.28402300 | 1.24779600  | 0.11535900  |
| H  | -3.36078200 | -1.42640200 | 0.15989100  |
| H  | -1.68128900 | -3.34210300 | 0.00426300  |
| H  | 0.73623200  | -2.71508500 | -0.00516400 |
| H  | 0.73614600  | 2.71508800  | -0.00510400 |
| H  | -1.68139100 | 3.34205200  | 0.00425300  |
| H  | -3.36083400 | 1.42629300  | 0.15987500  |
| Re | 0.60079700  | 0.00001200  | -0.08933000 |
| O  | 2.19863800  | 0.00002200  | 0.56567200  |

### 1-T<sub>1</sub>

E = -1227.409113 a.u.

|    |           |           |           |
|----|-----------|-----------|-----------|
| C  | -1.70012  | 1.249343  | 1.584112  |
| C  | -0.99581  | 2.354696  | 1.014744  |
| C  | -0.01102  | 2.050366  | 0.138863  |
| C  | -1.261653 | 0.000011  | 1.165348  |
| C  | -0.011015 | -2.050365 | 0.138904  |
| C  | -0.995793 | -2.354677 | 1.014802  |
| C  | -1.700104 | -1.249312 | 1.58415   |
| H  | -2.482393 | 1.385543  | 2.326479  |
| H  | -1.223423 | 3.376563  | 1.30492   |
| H  | 0.664207  | 2.804545  | -0.257647 |
| H  | 0.664206  | -2.804551 | -0.257602 |
| H  | -1.223403 | -3.376539 | 1.305003  |
| H  | -2.482366 | -1.385499 | 2.326531  |
| Re | 0.451808  | -0.000003 | -0.30375  |
| Cl | 2.217893  | 0.000023  | 1.146783  |
| P  | -1.757627 | -0.000019 | -1.485498 |
| H  | -2.615471 | 1.08904   | -1.270273 |
| H  | -1.677707 | -0.000035 | -2.893571 |
| H  | -2.615469 | -1.089074 | -1.270247 |
| O  | 0.97744   | -0.000028 | -1.948836 |

### 2-T<sub>1</sub>

E = -1227.433944 a.u.

|   |           |           |           |
|---|-----------|-----------|-----------|
| C | -2.356992 | -1.262589 | -0.229683 |
| C | -1.453387 | -2.346759 | -0.070545 |
| C | -0.12863  | -2.027092 | 0.014188  |
| C | -1.773077 | 0.000273  | -0.248139 |
| C | -0.128041 | 2.027129  | 0.014635  |
| C | -1.452616 | 2.347199  | -0.070293 |



C -2.356558 1.263228 -0.229645  
H -3.432693 -1.410191 -0.26905  
H -1.818212 -3.365276 0.026229  
H 0.629992 -2.777073 0.220643  
H 0.631006 2.776689 0.220995  
H -1.817187 3.365819 0.026419  
H -3.432213 1.41117 -0.269009  
Re 0.369031 -0.000063 -0.405551  
P -0.371409 -0.000152 2.236012  
H -1.144364 -1.072886 2.721895  
H 0.634455 -0.001033 3.225816  
H -1.14295 1.073382 2.722336  
O 0.547808 0.000155 -2.093239  
Cl 2.488197 -0.000187 0.583098

C -0.043268 1.919509 0.000329  
C -1.3899 2.30495 0.000225  
C -2.308598 1.249082 -0.000299  
H -3.389477 -1.416184 0.000504  
H -1.707711 -3.347674 0.000652  
H 0.708795 -2.712745 0.000063  
H 0.709616 2.71265 0.000563  
H -1.706574 3.348197 0.000836  
H -3.389061 1.417096 -0.000513  
Re 0.598696 -0.000083 -0.000071  
O 2.367364 -0.000302 0.000144

### 3-T<sub>1</sub>

E = -767.217611 a.u.

C 0.133219 2.033851 0.021764  
C 1.433324 2.348128 0.320306  
C 2.323704 1.24752 0.420706  
C 1.728541 -0.000799 0.228759  
C 2.322645 -1.249559 0.420054  
C 1.431291 -2.349508 0.318995  
C 0.131559 -2.03393 0.020629  
H 1.779168 3.369455 0.484421  
H 3.373931 1.368022 0.688683  
H 3.372693 -1.371171 0.68826  
H 1.776395 -3.371181 0.482504  
H -0.59739 -2.844285 -0.055182  
Re -0.362095 0.000316 -0.367047  
O -1.014166 0.001335 -1.97593  
P -1.630787 -0.000211 1.608302  
H -3.027104 -0.000042 1.333307  
H -1.688025 -1.058491 2.567369  
H -1.688209 1.057256 2.568257  
H -0.594892 2.845004 -0.053466

### 4-T<sub>1</sub>

E = -424.017630 a.u.

C -2.308982 -1.248463 0.000089  
C -1.390607 -2.304537 0.000234  
C -0.043989 -1.919519 0.000111  
C -1.692442 0.0002 -0.000348
